# Supplementary figures and images for: Structural, optical, photoluminescence and photocatalytic characteristics of sol-gel derived CeO2-TiO2 films
Source: MDPI journal article supplement (doi:10.3390/toxins14070503), 2009-01-12

# FC136-2A

Q 356.20>321.20 (+)

5.33e3

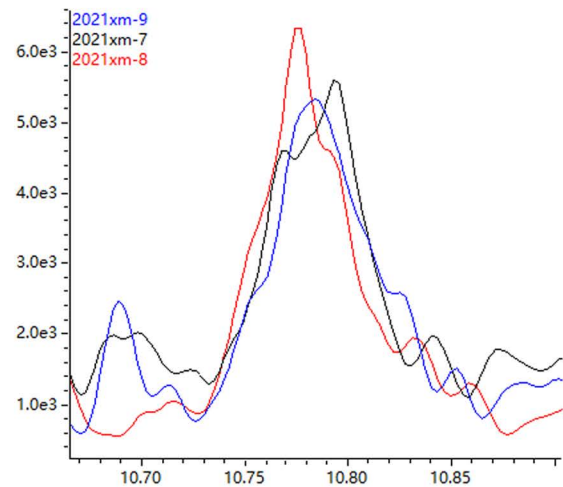

# FC136-2A-V-

Q 356.20>321.20 (+)

1.32e4

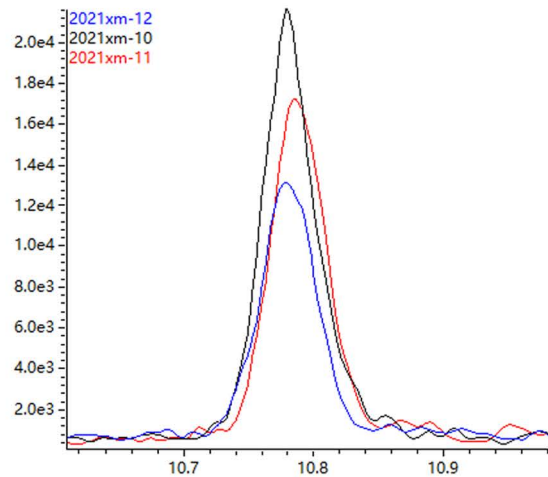

Supplement: s1 [file s1]

**A**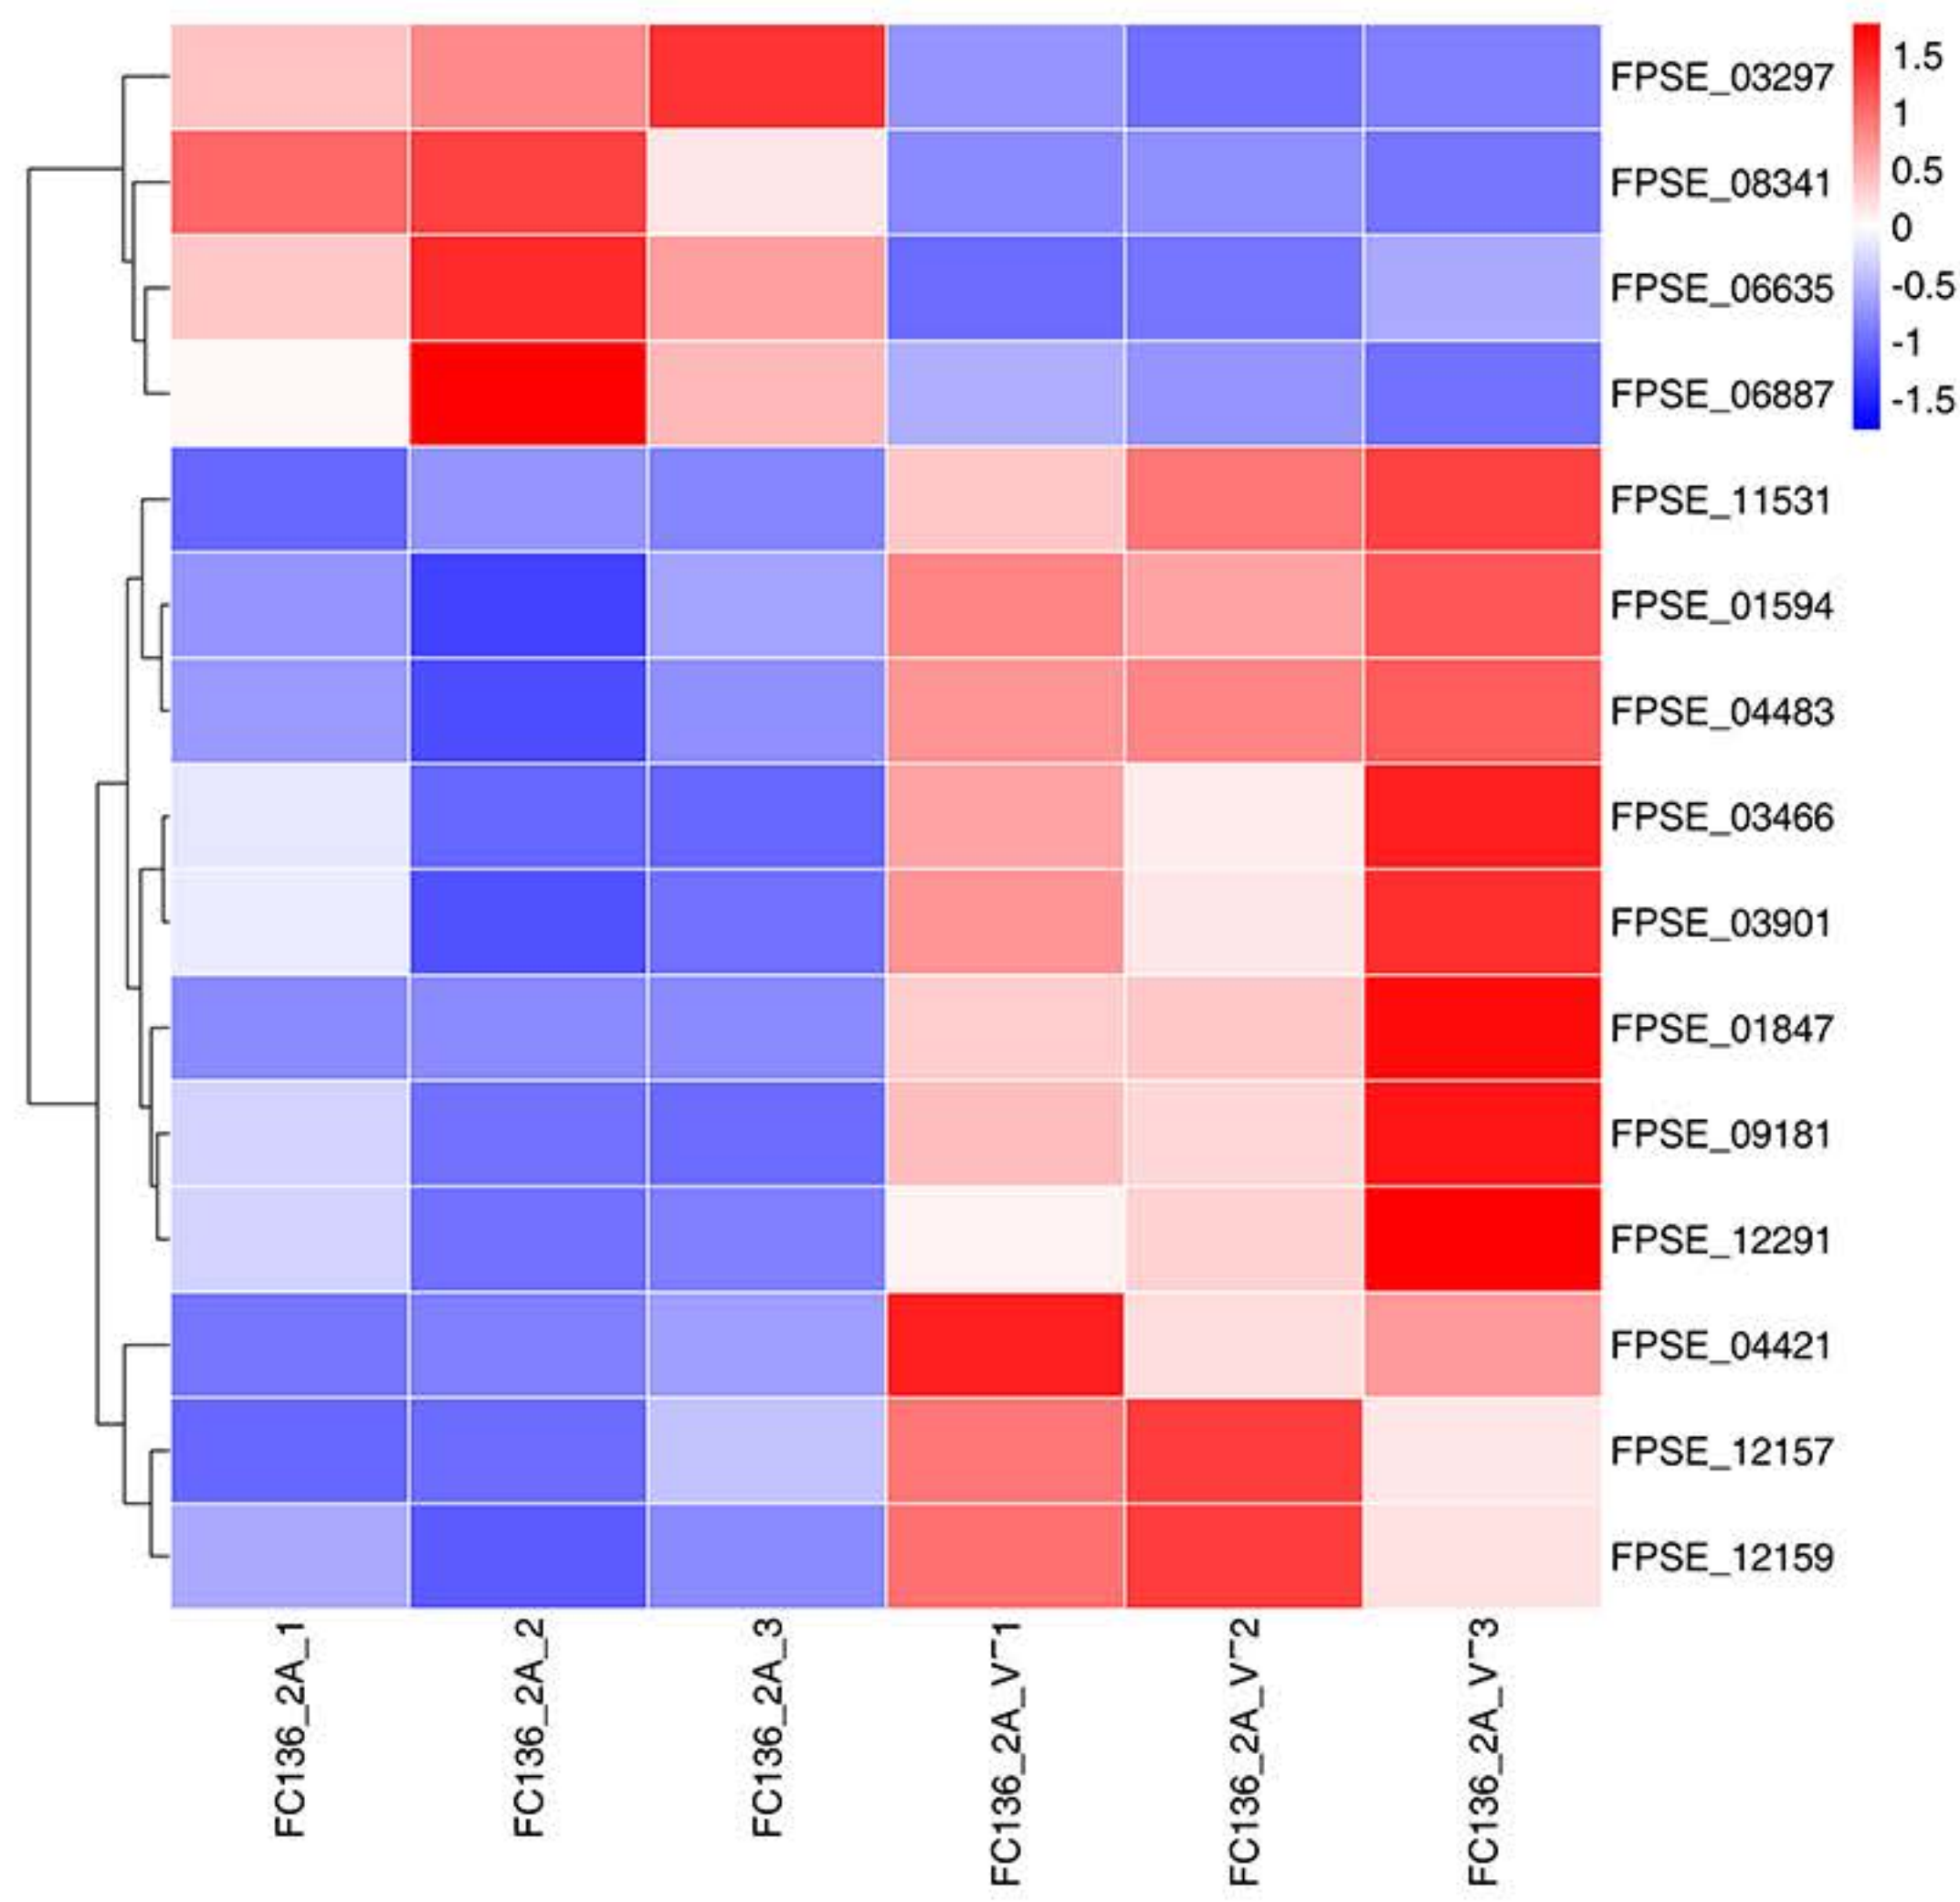**B**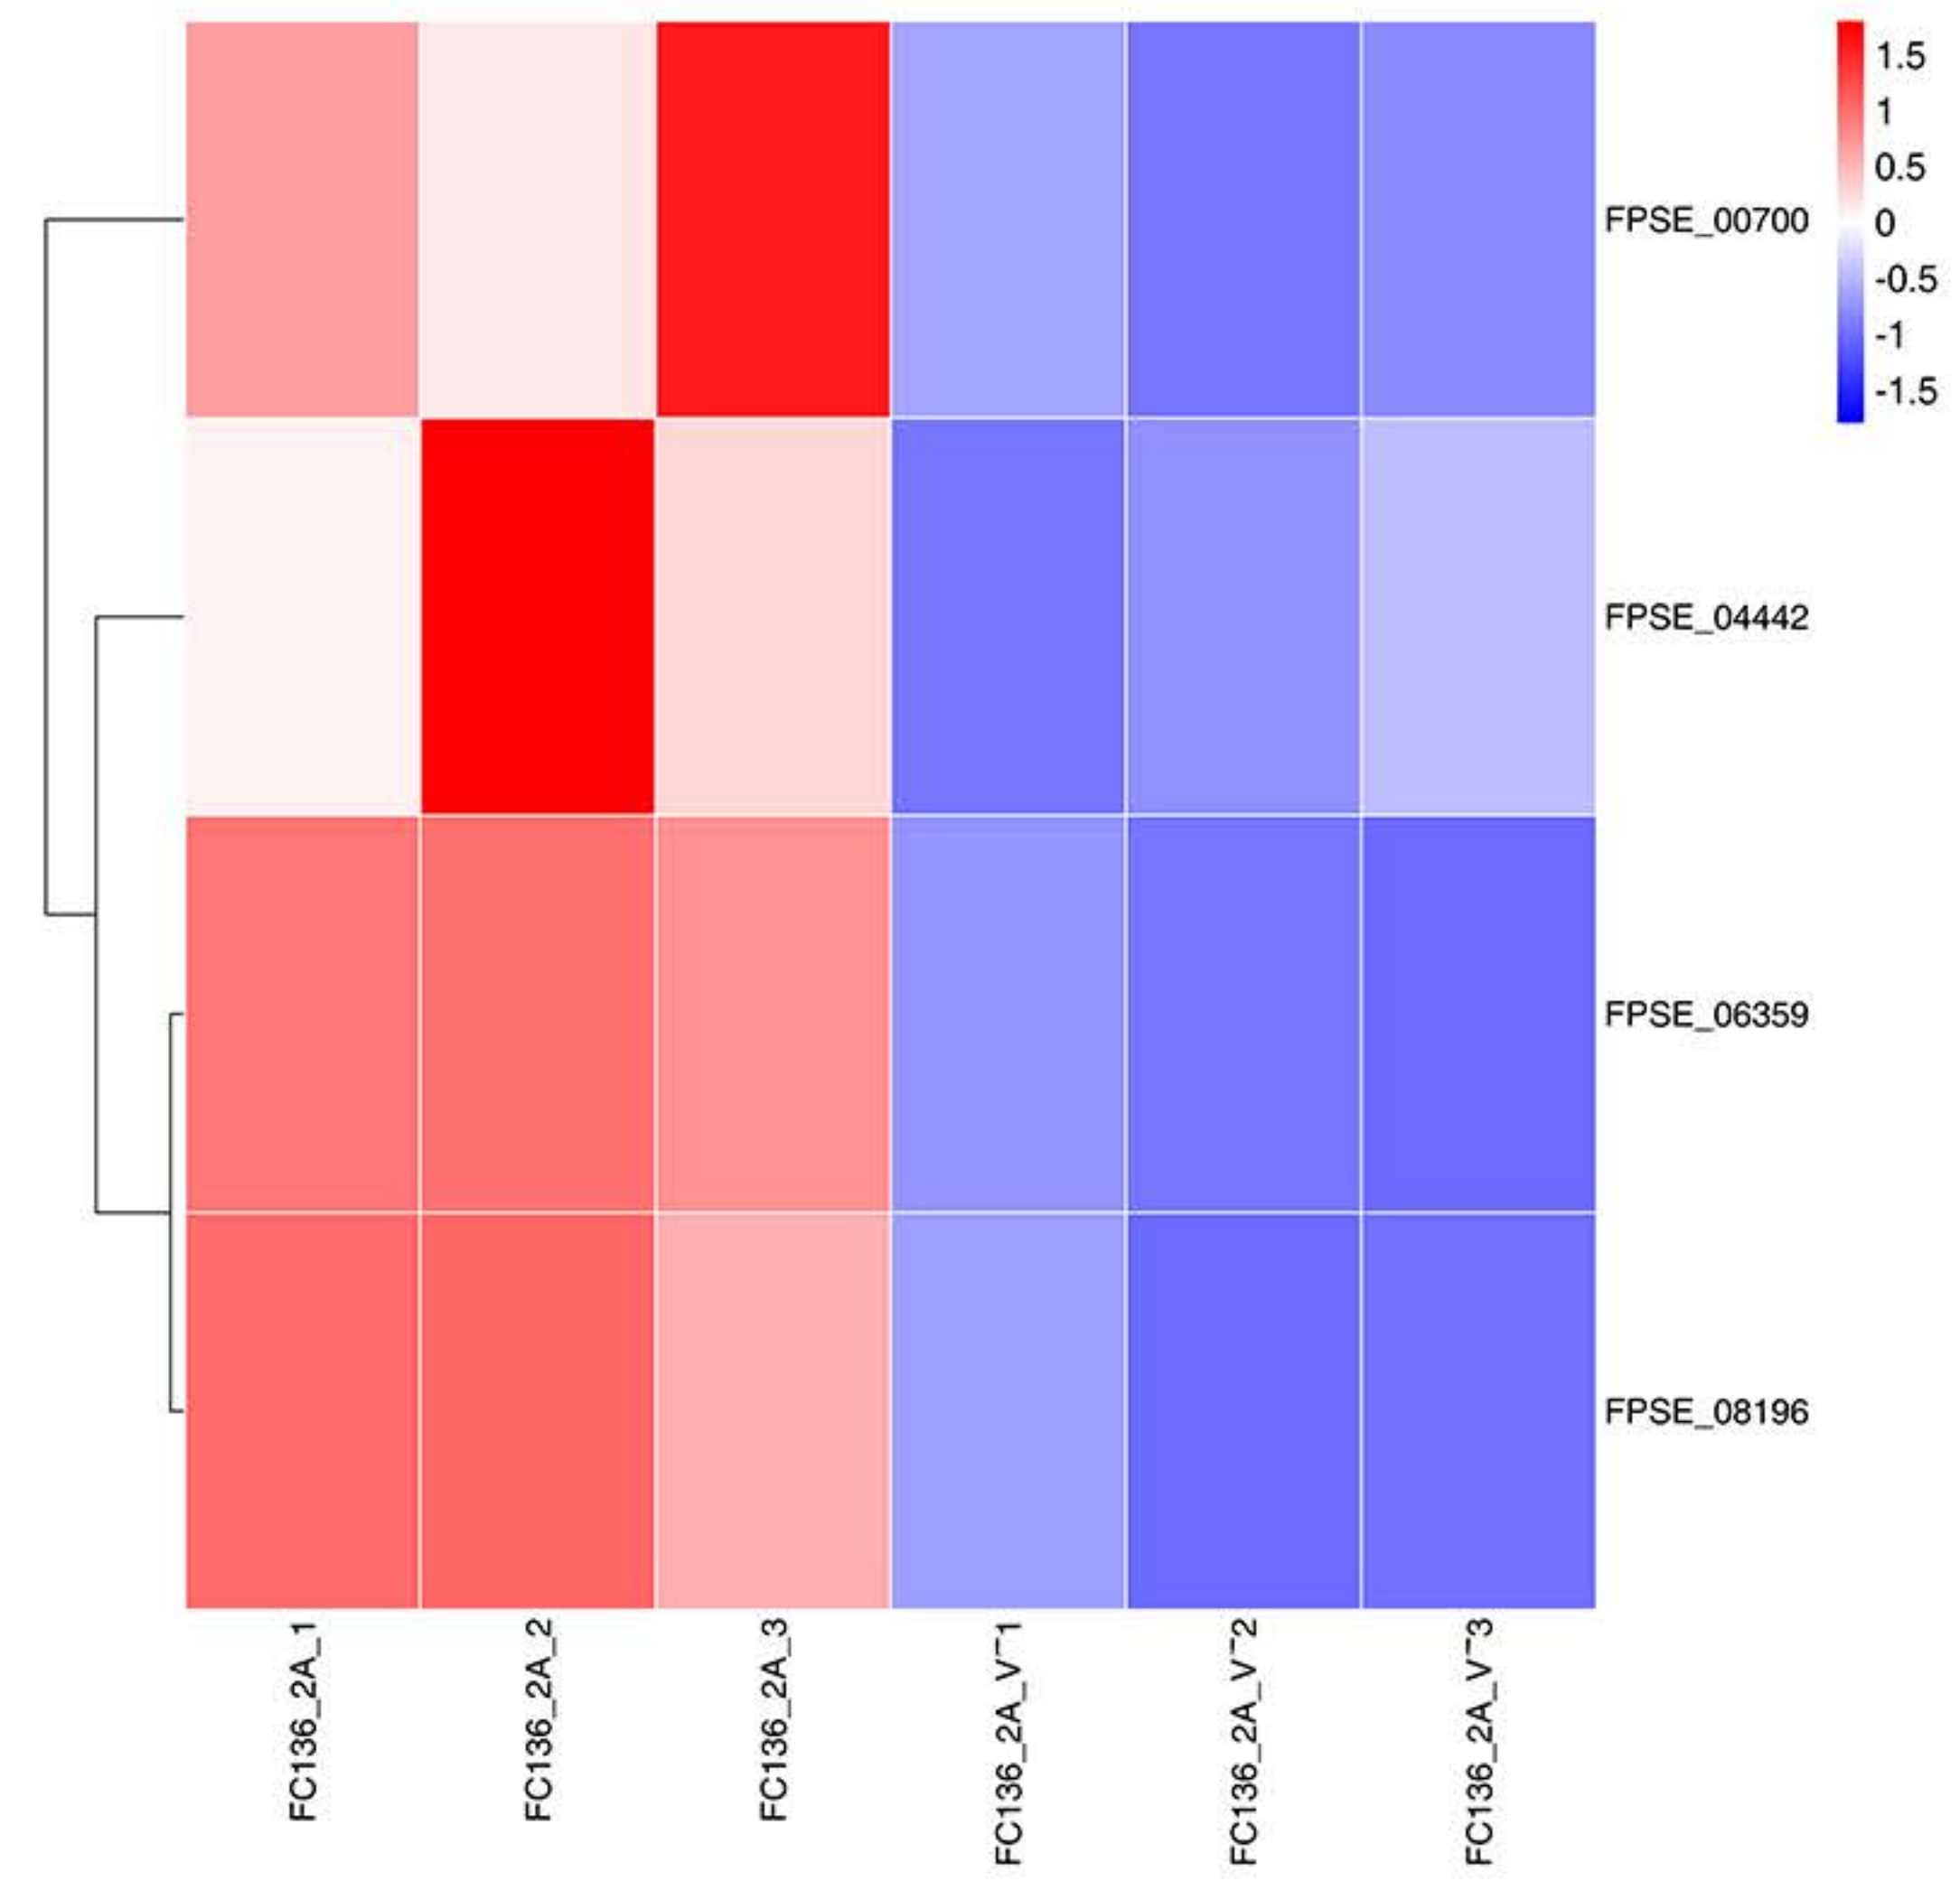

Supplement: s1 [file s1]
